# Supplementary figures and images for: A tug of war between filament treadmilling and myosin induced contractility generates actin rings
Source: eLife journal article supplement (doi:10.7554/elife.82658), 2022-10-07

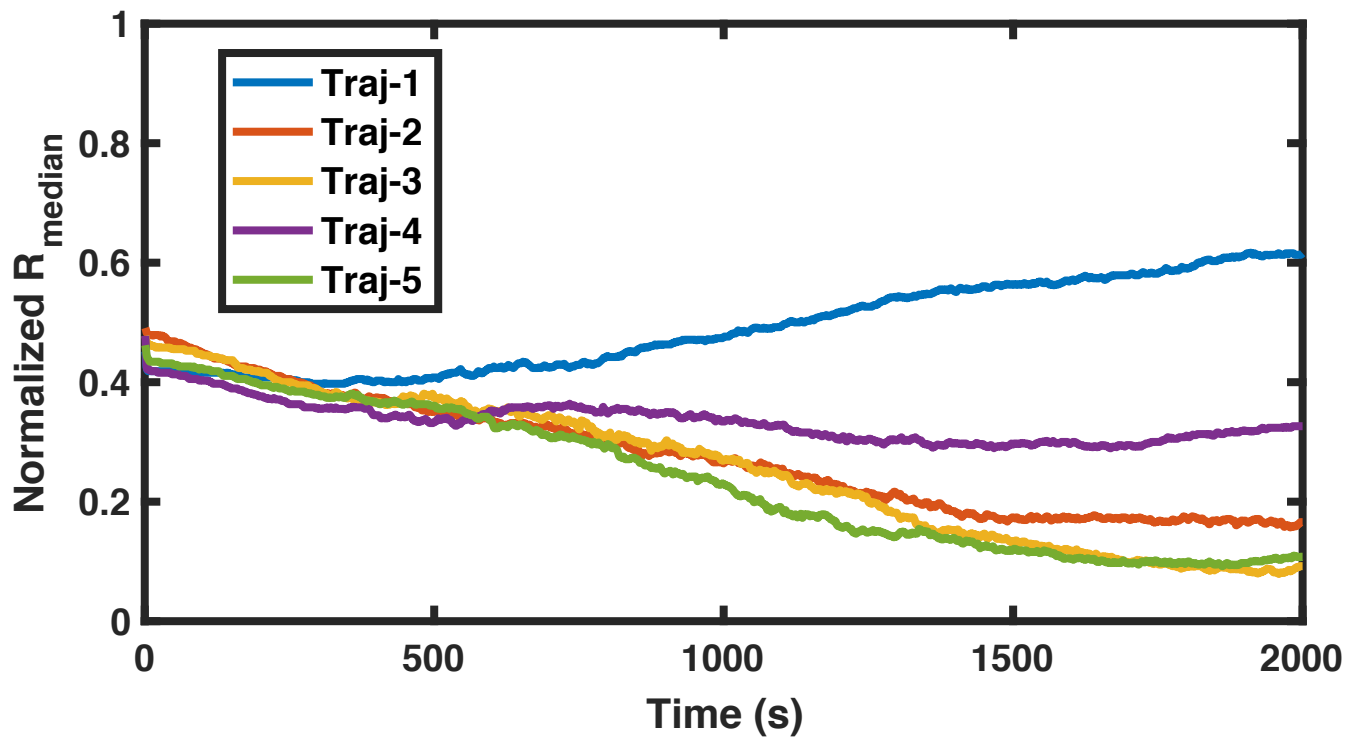

Traj-1

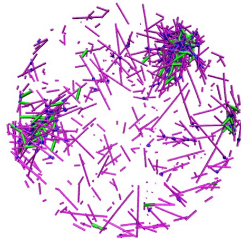

Traj-2

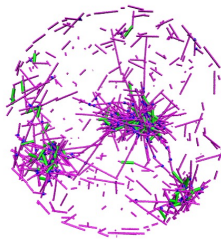

Traj-3

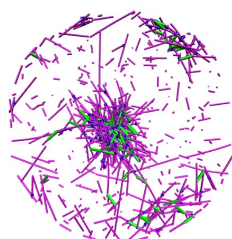

Traj-4

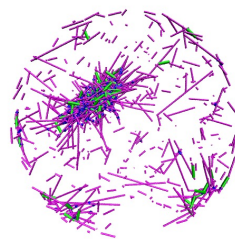

Traj-5

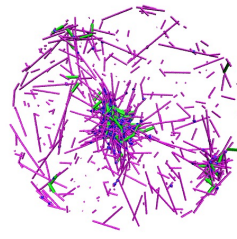

Supplement: supp [file elife-82658-supp-v1.zip]

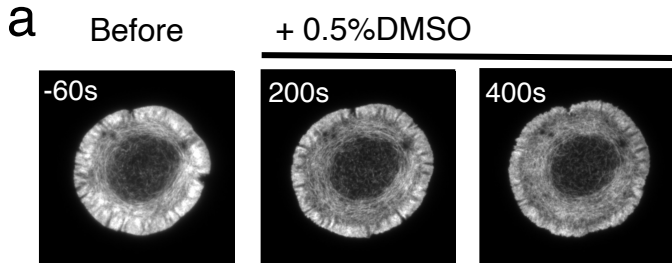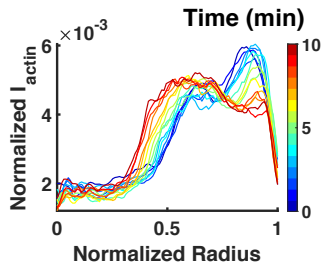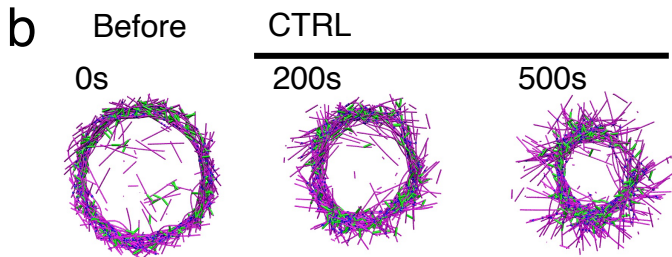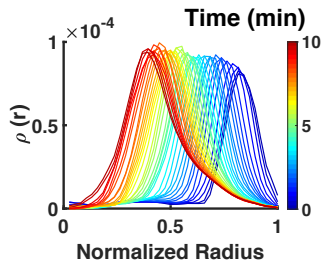

Supplement: supp [file elife-82658-supp-v1.zip]

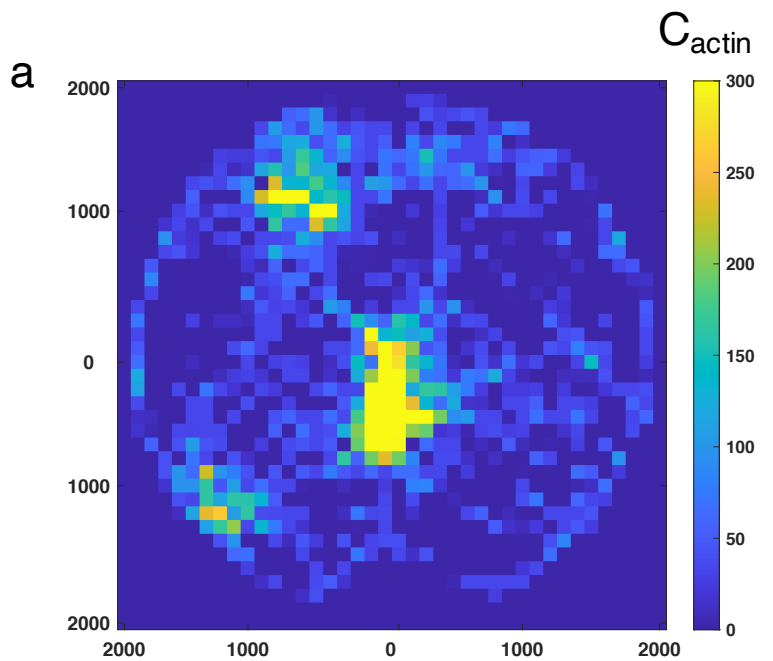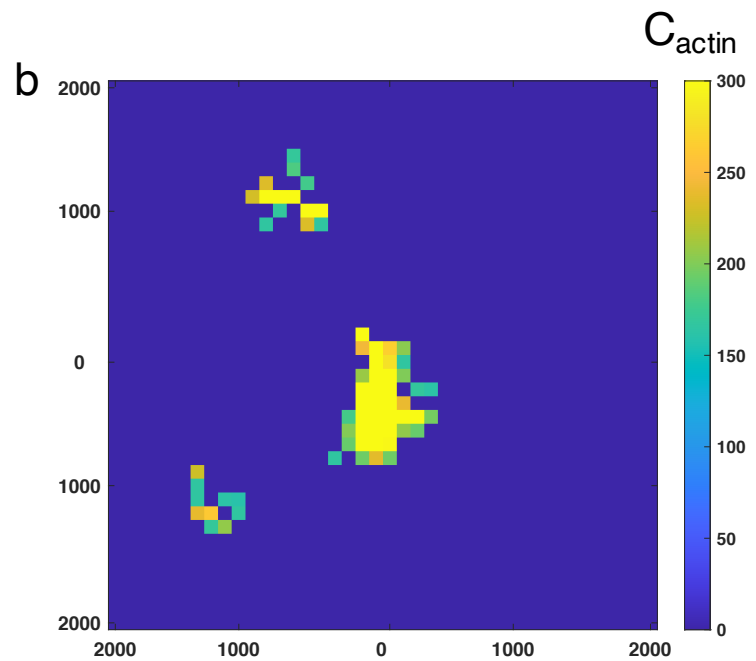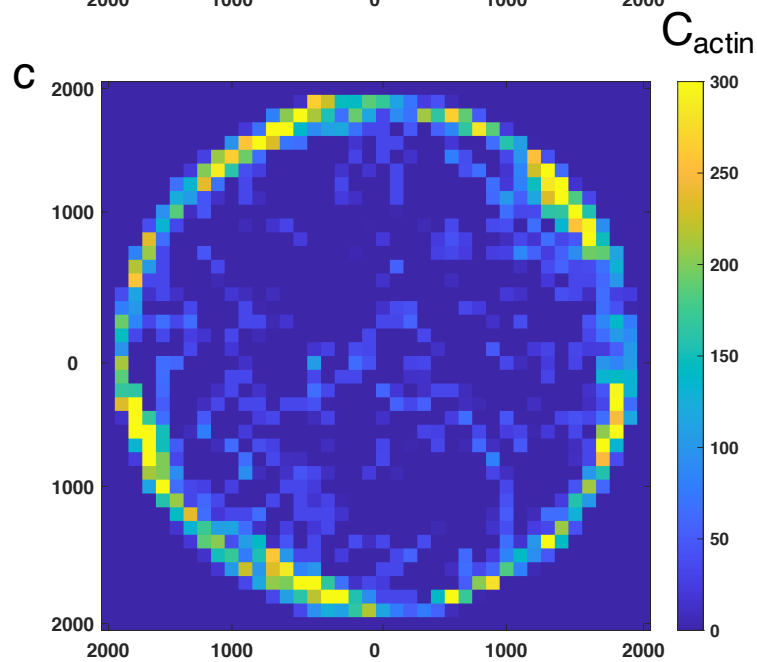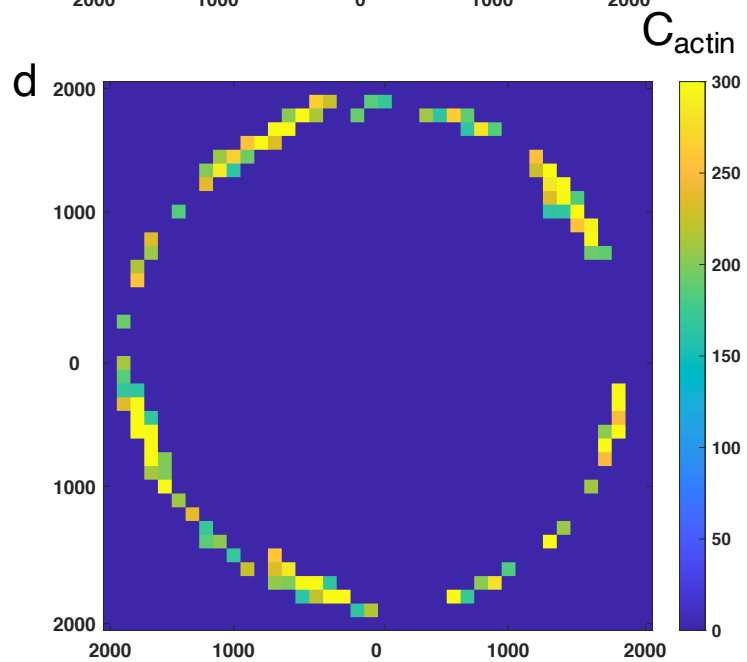

Supplement: supp [file elife-82658-supp-v1.zip]

a

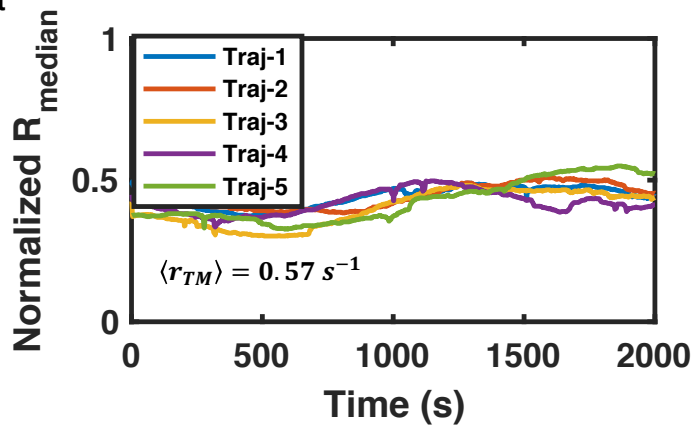

b

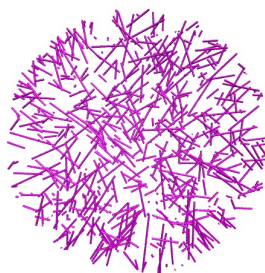

c

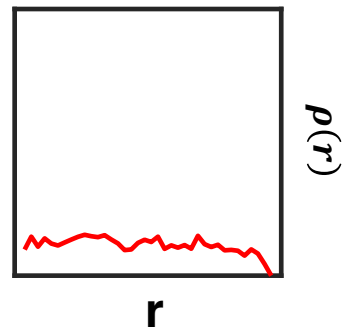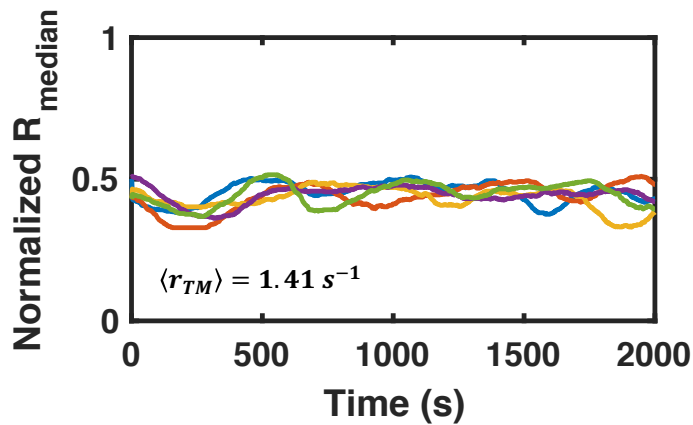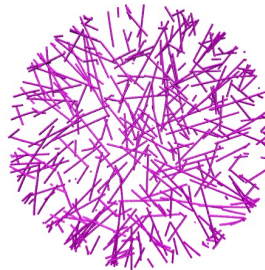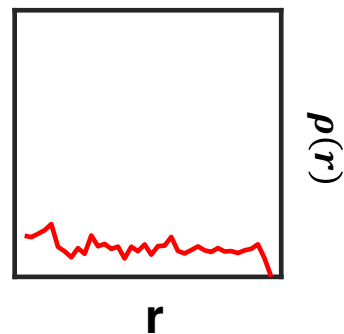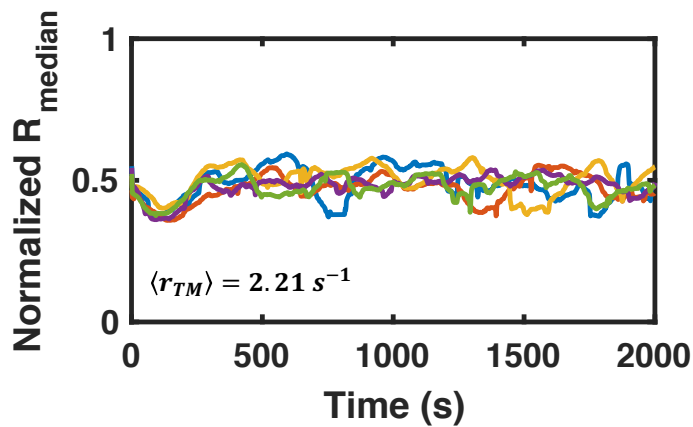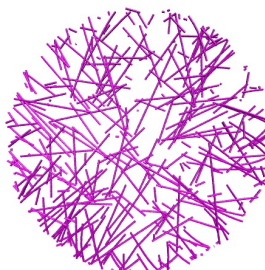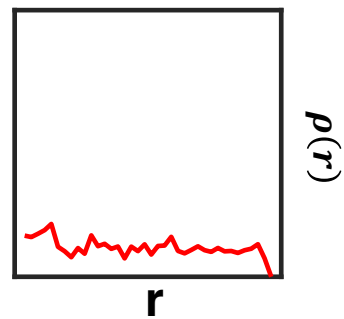

Supplement: supp [file elife-82658-supp-v1.zip]

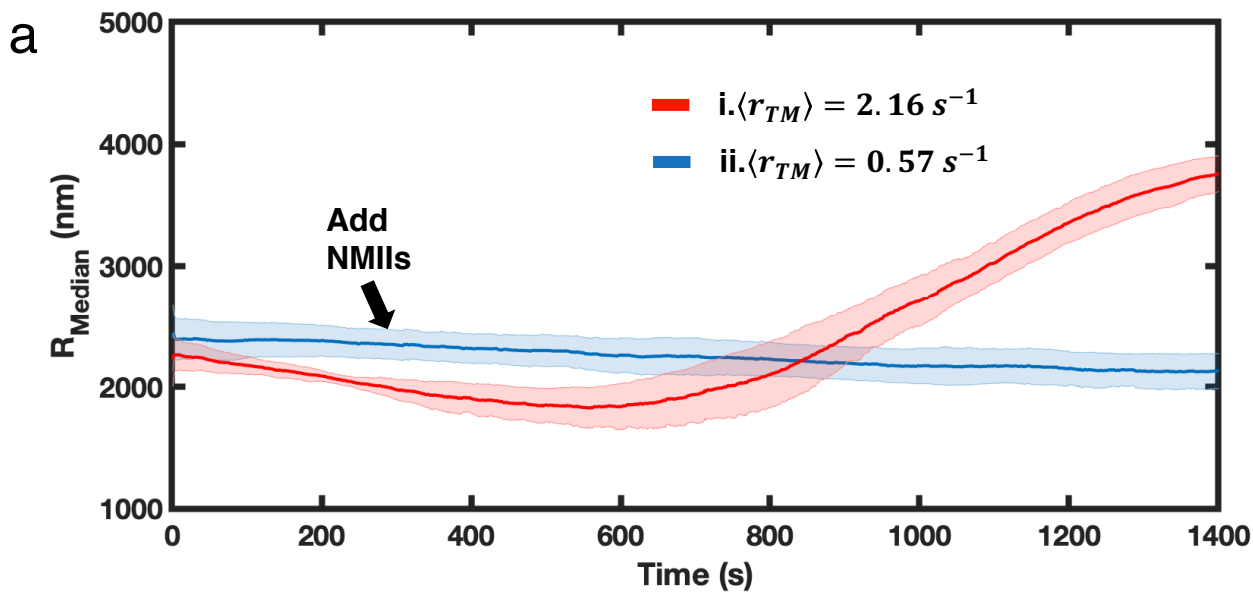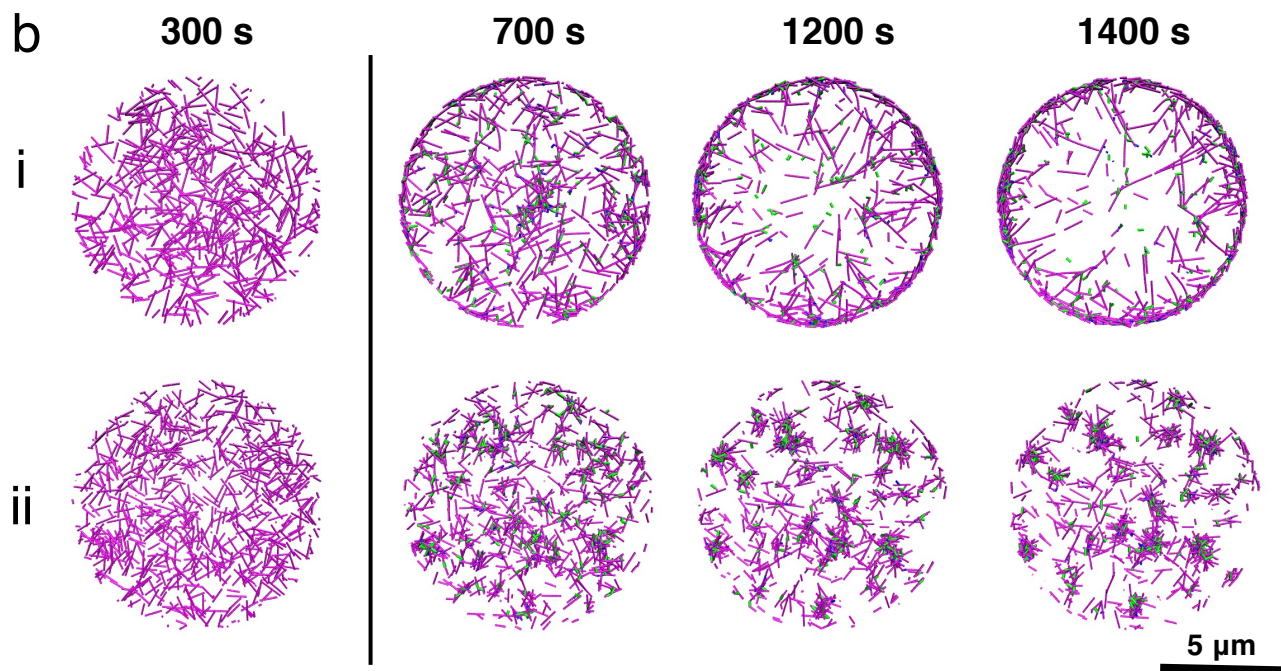

Supplement: supp [file elife-82658-supp-v1.zip]

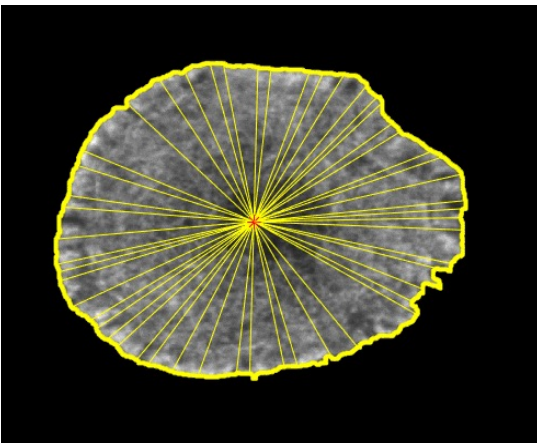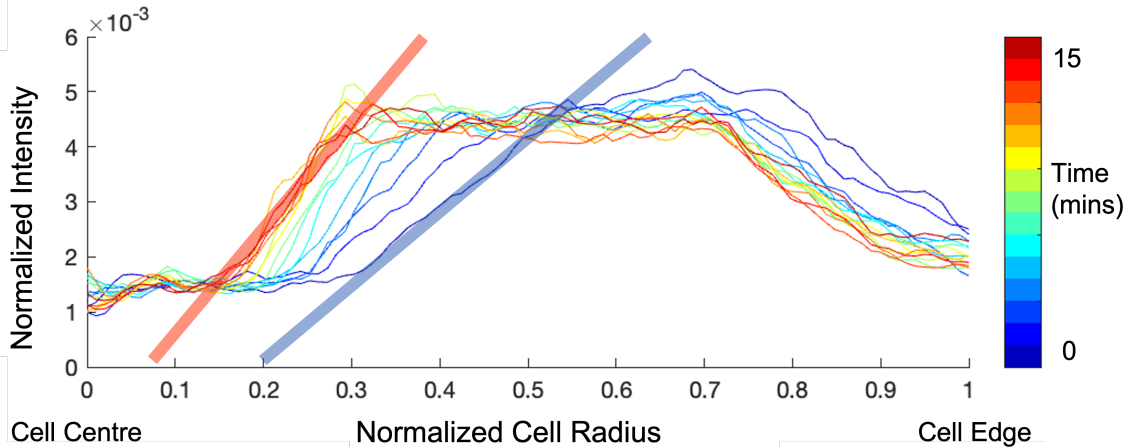

Supplement: supp [file elife-82658-supp-v1.zip]

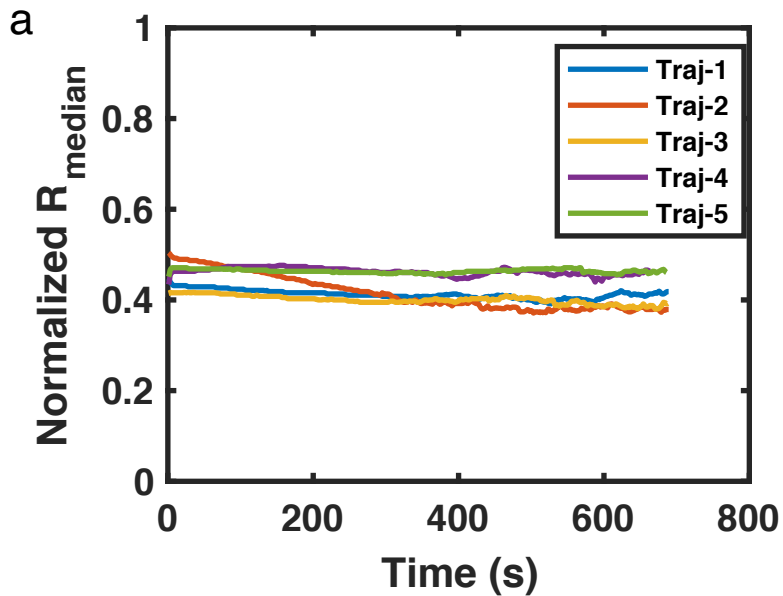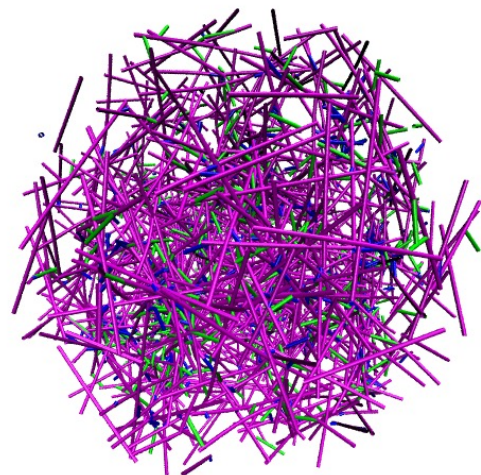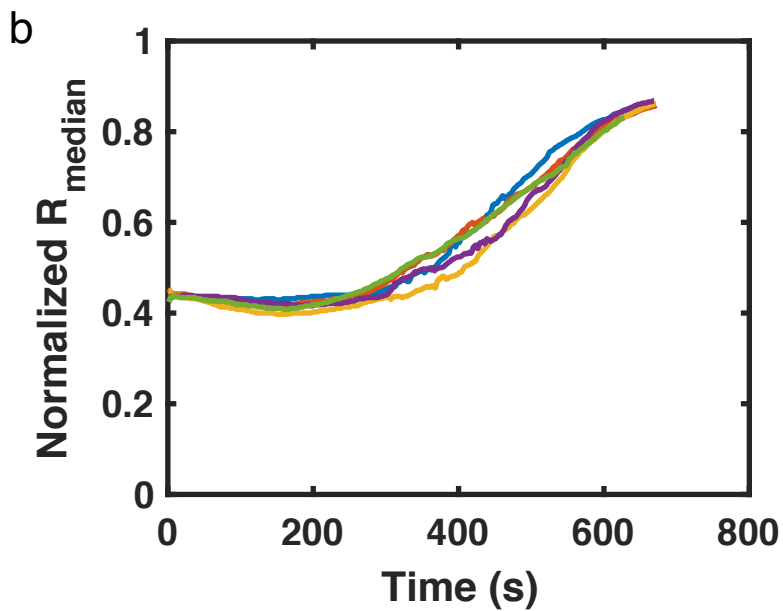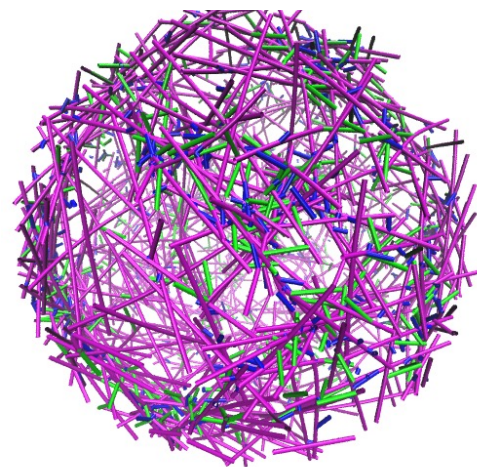

Supplement: supp [file elife-82658-supp-v1.zip]

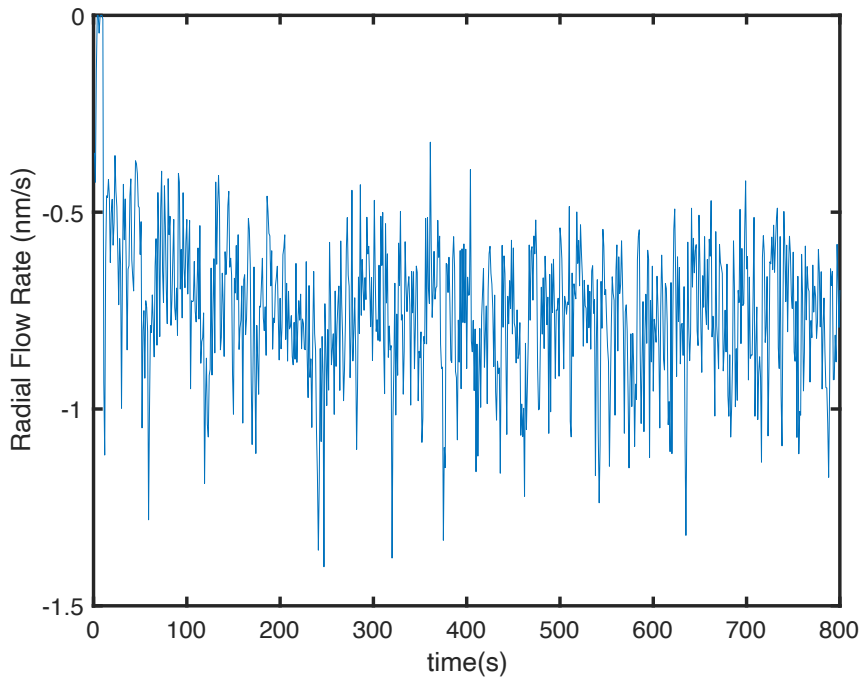

Supplement: supp [file elife-82658-supp-v1.zip]

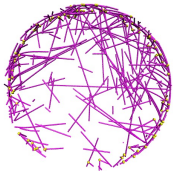

$1\mu M$

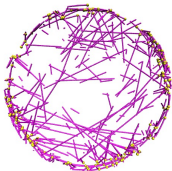

$2\mu M$

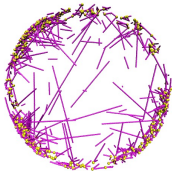

$4\mu M$

$C_{Arp2/3}$

Supplement: supp [file elife-82658-supp-v1.zip]

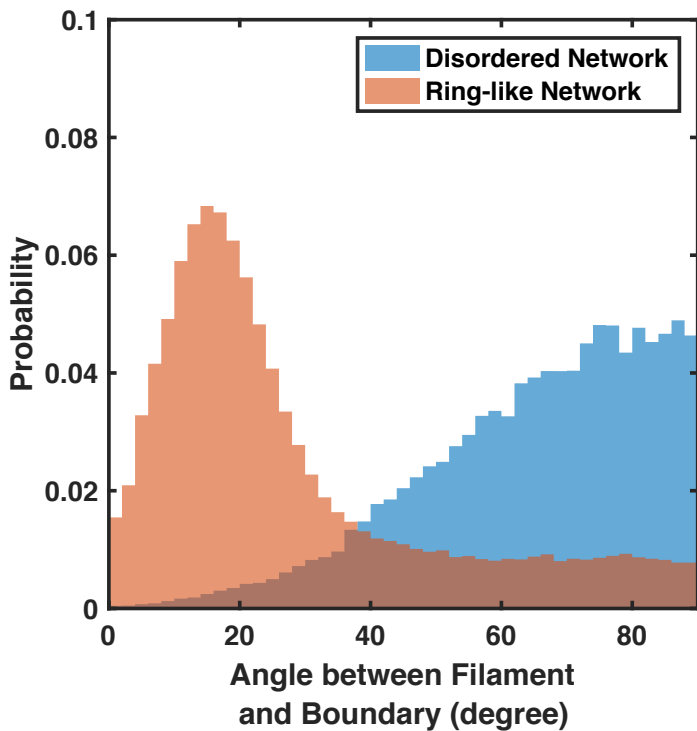

Supplement: supp [file elife-82658-supp-v1.zip]

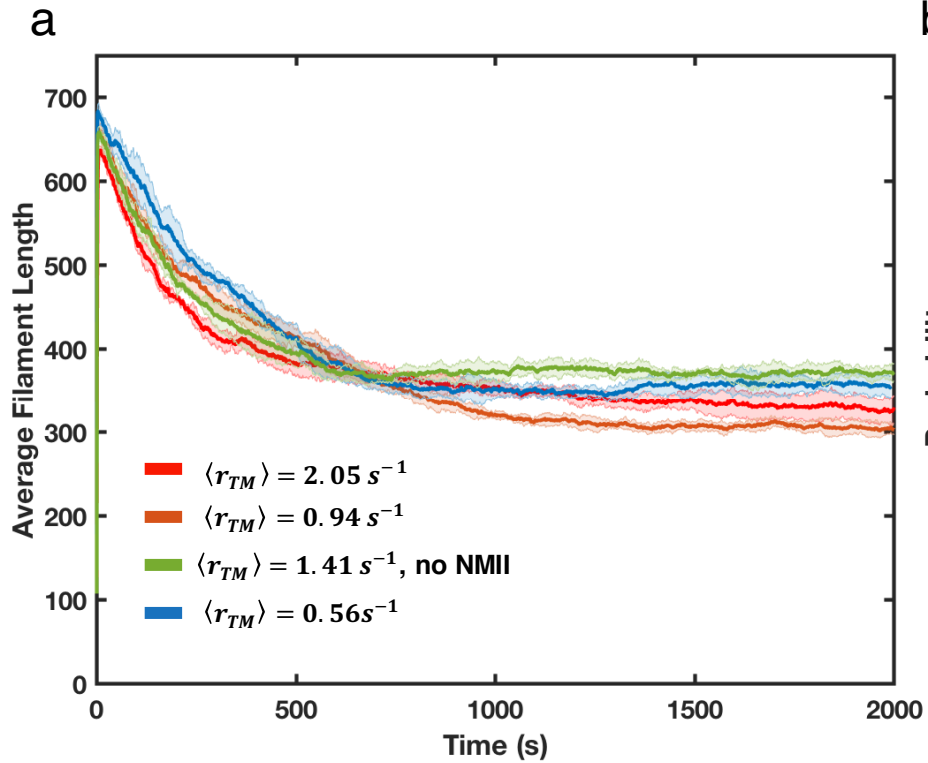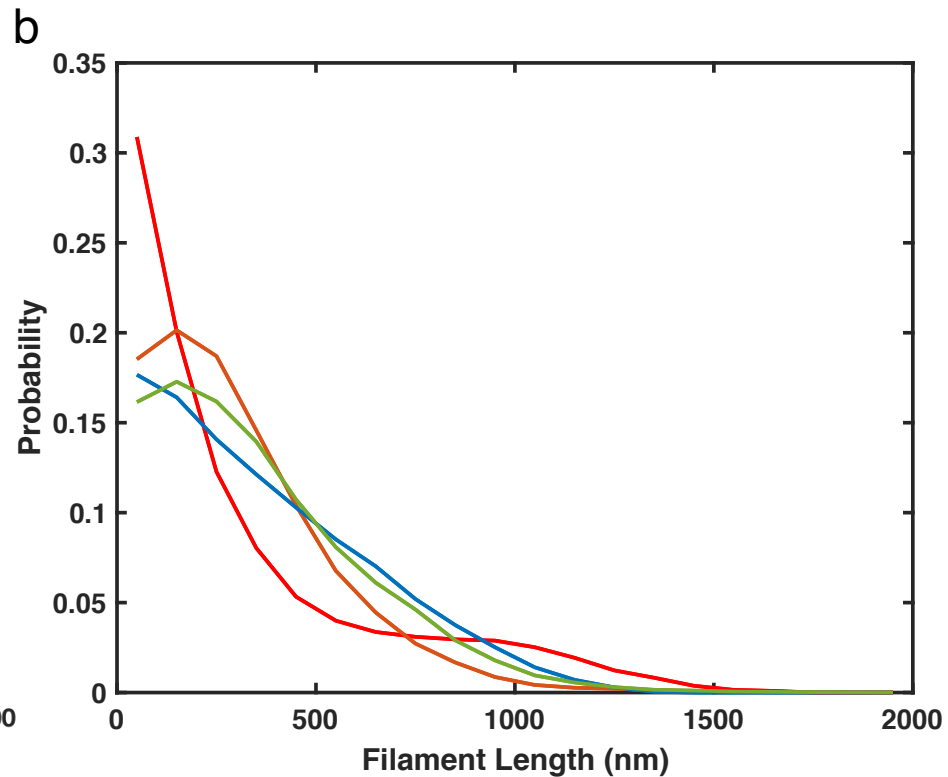

Supplement: supp [file elife-82658-supp-v1.zip]

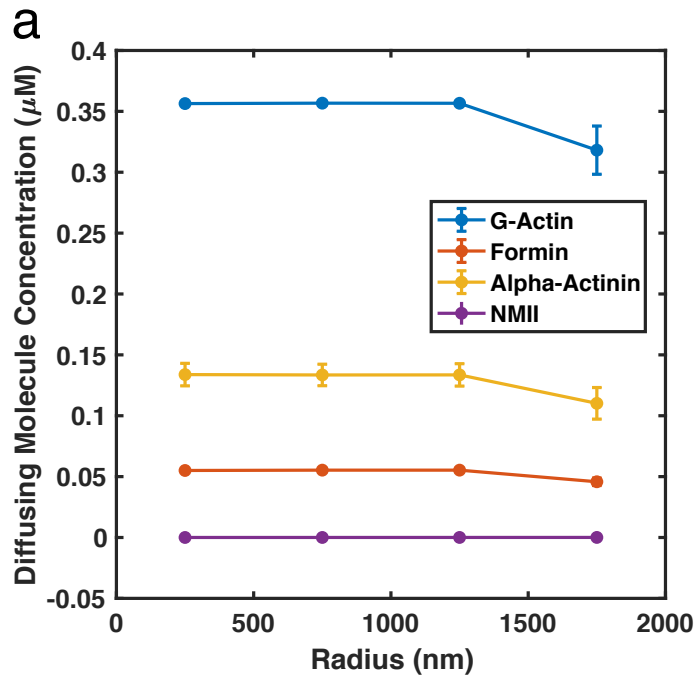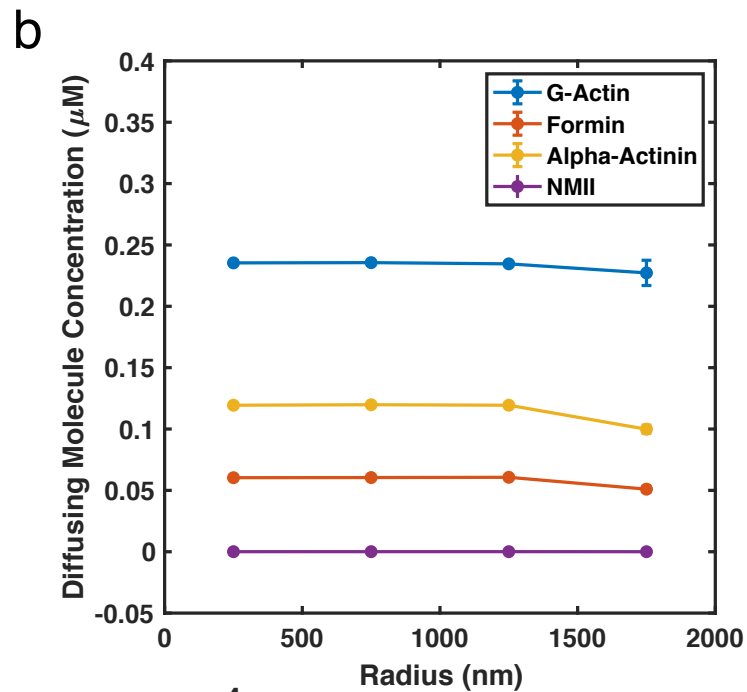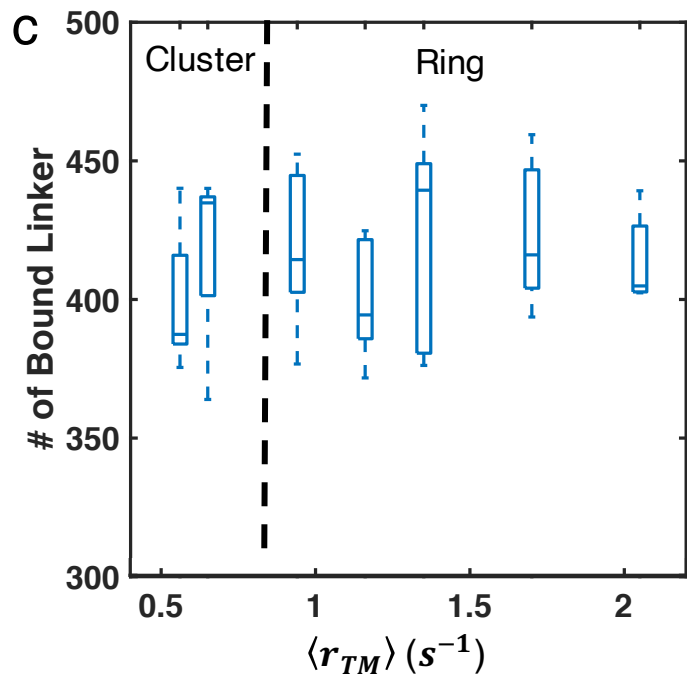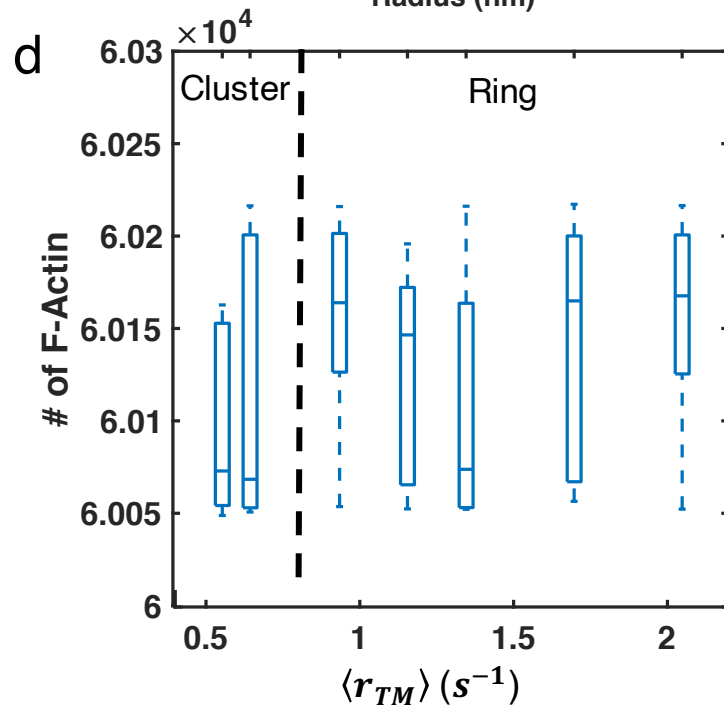

Supplement: supp [file elife-82658-supp-v1.zip]

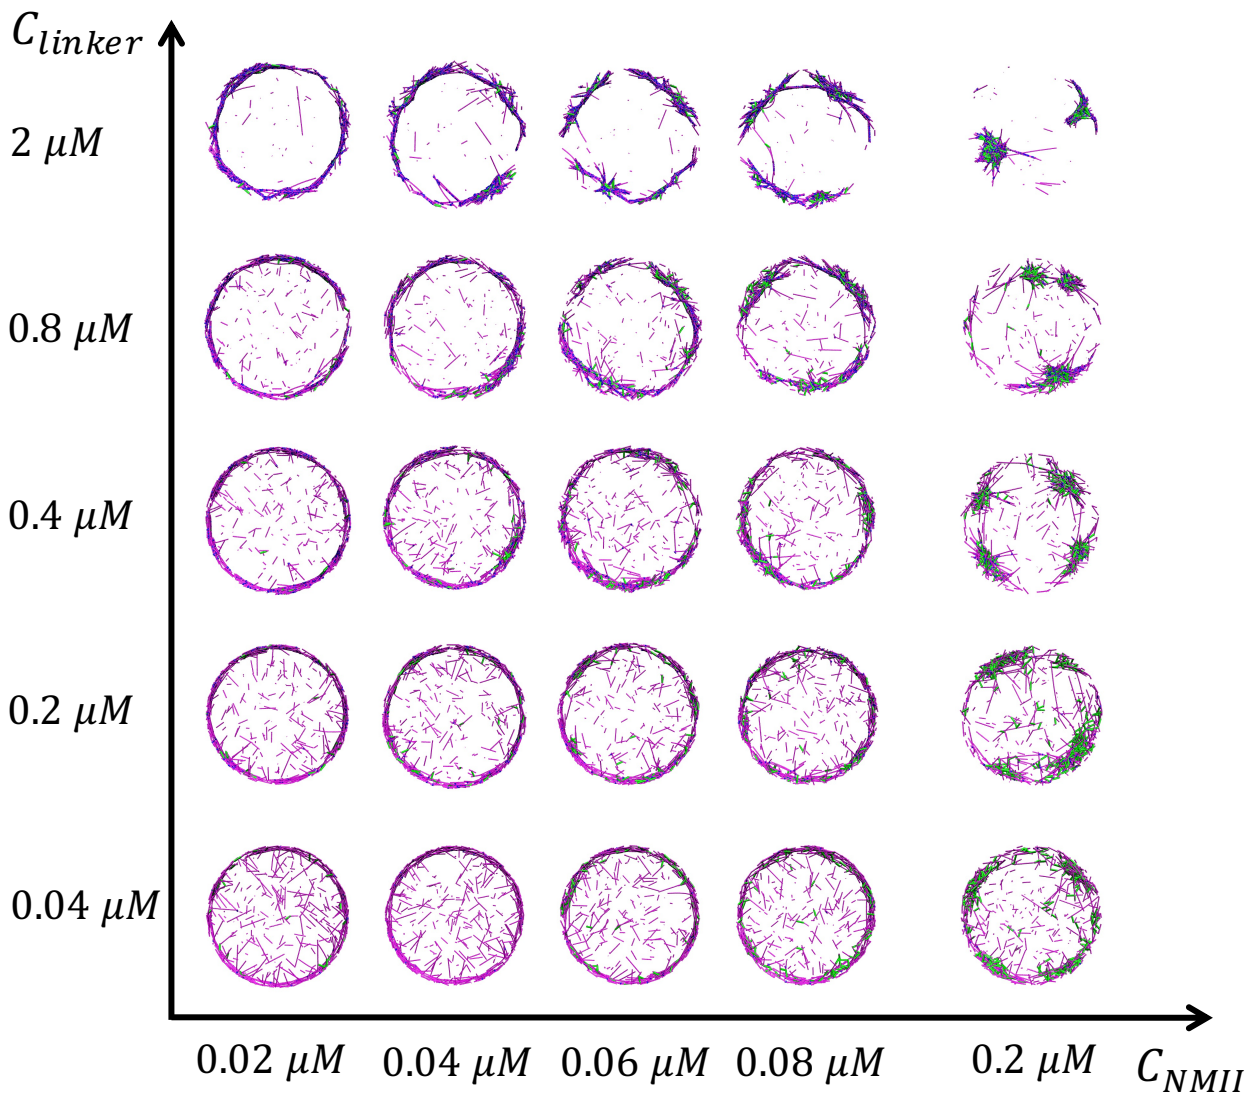

Supplement: supp [file elife-82658-supp-v1.zip]
